# Supplementary material
Source: PubMed Central journal article supplement (PMC6191350)
Supplement: NIHMS979716-supplement-2.pdf [file NIHMS979716-supplement-2.pdf]

**Supplementary Table 1.** Primers with forward and reverse sequences are listed for Kaposi's sarcoma herpesvirus antigens tested.

| <i>Primer</i> | <i>Forward</i>         | <i>Reverse</i>         |
|---------------|------------------------|------------------------|
| Orf 71        | ggatgccctaattgtcaatgc  | ggcgatagtgttgggagtgt   |
| Orf 72        | cattcccgcctctattatca   | atgacgttggcaggaacca    |
| Orf 73        | gcgcccttaacgagaggaagtt | ttccttcgcggtttagatg    |
| K12           | ttcatgtcccggatgtgta    | taatcgccaacagacaaac    |
| Orf 50        | ccctgagccagtttgcatt    | atgggttaaaggggatgatg   |
| Orf 27        | caccacgtttgacgcatt     | taatccgtaggcctgccgt    |
| K2            | aaaacacgcaccgcttgacctg | ttcactgctggtatctggaacg |
| K4            | gcatcctgctcgtcgtgtg    | gcttctcaccagctcttc     |
| K5            | gcagagaaaaccgagcac     | gggaagaggtggggaacg     |
| K6            | gctgcctaaccagttttg     | ttacctgacgcccacagaaa   |
| Orf 64        | tgaggaataaggcagctgtgg  | gaagccgtgtcggattcatc   |
| K8.1          | tggtccgcggttcagtcataa  | gcggccgctaagaaaatcga   |
| GAPDH         | gagtcaacggatttggctgt   | ttgattttggagggatctcg   |
